# Supplementary material for: A single 2′-O-methylation of ribosomal RNA gates assembly of a functional ribosome
Source: PubMed Central journal article supplement (PMC9851907; doi:10.1038/s41594-022-00891-8), 2022-12-19

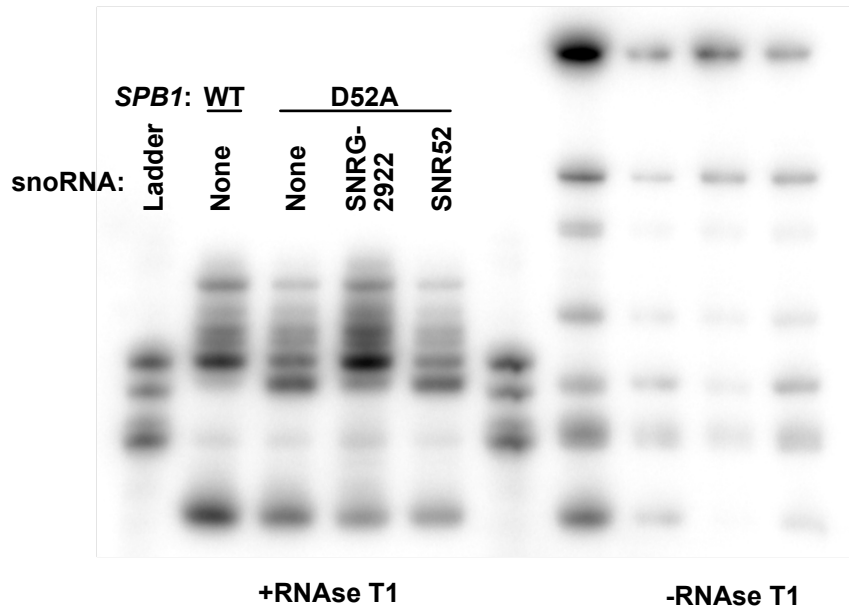

Supplement: 41594_2022_891_MOESM5_ESM.pdf [file 41594_2022_891_MOESM5_ESM.pdf]
